# Supplementary material for: Formation mechanism for planes (011) and (001) oriented Mg(OH)2 films electrodeposited on SnO2 coating glass
Source: Royal Society of Chemistry journal article supplement (doi:10.1039/c0ce00728e), 2011-01-01
Supplement: c0ce00728e.pdf [file c0ce00728e.pdf]

# Formation mechanism for planes (011) and (001) oriented Mg(OH)<sub>2</sub> films electrodeposited on SnO<sub>2</sub> coating glass

Ying Lv <sup>a</sup> Zhian Zhang <sup>a</sup> Yanqing Lai <sup>a\*</sup> Jie Li <sup>a</sup> and Yexiang Liu <sup>a</sup>

## 5 Electrochemical characterization

In this work, the average current density was  $-0.27 \text{ mA}\cdot\text{cm}^{-2}$  at  $-1.2 \text{ V}$  with potentiostatic method, while  $-4.8 \text{ mA}\cdot\text{cm}^{-2}$  was get at  $-2.0 \text{ V}$  with slope of  $6.59 \text{ mA}\cdot\text{cm}^{-2}\cdot\text{V}^{-1}$  with linear sweep voltage method.

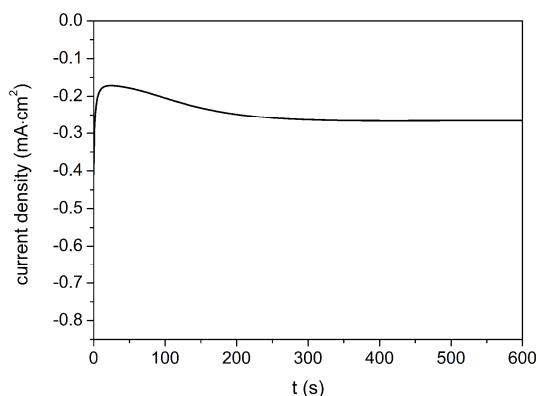

Fig. S1 Chronoamperometric curve for Mg(OH)<sub>2</sub> films deposition at  $-1.2 \text{ V}$  vs. SCE

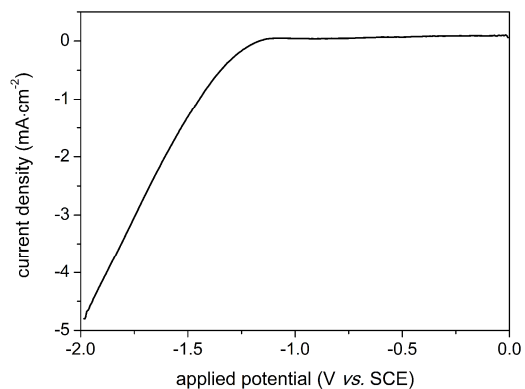

Fig. S2 IV curve of linear sweep voltage method (sweeping rate:  $10 \text{ mV/s}$ )
